# Supplementary material for: Rosmarinic Acid Production from Origanum dictamnus L. Root Liquid Cultures In Vitro
Source: MDPI journal article supplement (doi:10.3390/plants12020299), 2023-01-08
Supplement: s1 [file s1]

# Rosmarinic acid production from *Origanum dictamnus* L. root liquid cultures *in vitro*

Virginia Saropoulou, Charikleia Paloukopoulou, Anastasia Karioti, Eleni Maloupa, Katerina

Grigoriadou\*

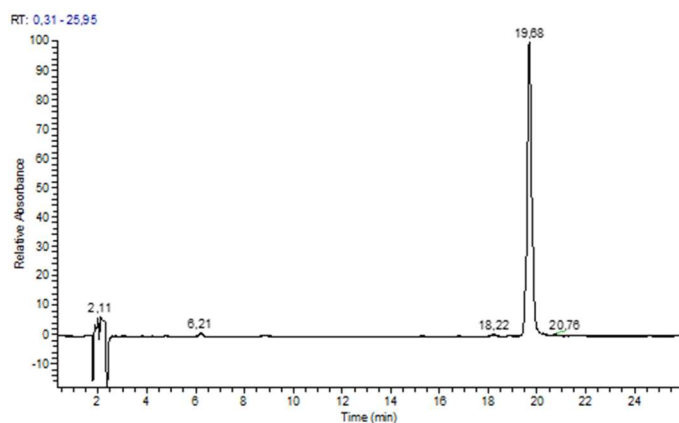

**Figure S1** Representative chromatograms of the *Origanum dictamnus* roots at 330 nm. Experimental conditions: column: Zorbax SbAq RP-C18 (150 × 3.0 mm), particle size of 5μm (Agilent) at 30 °C.

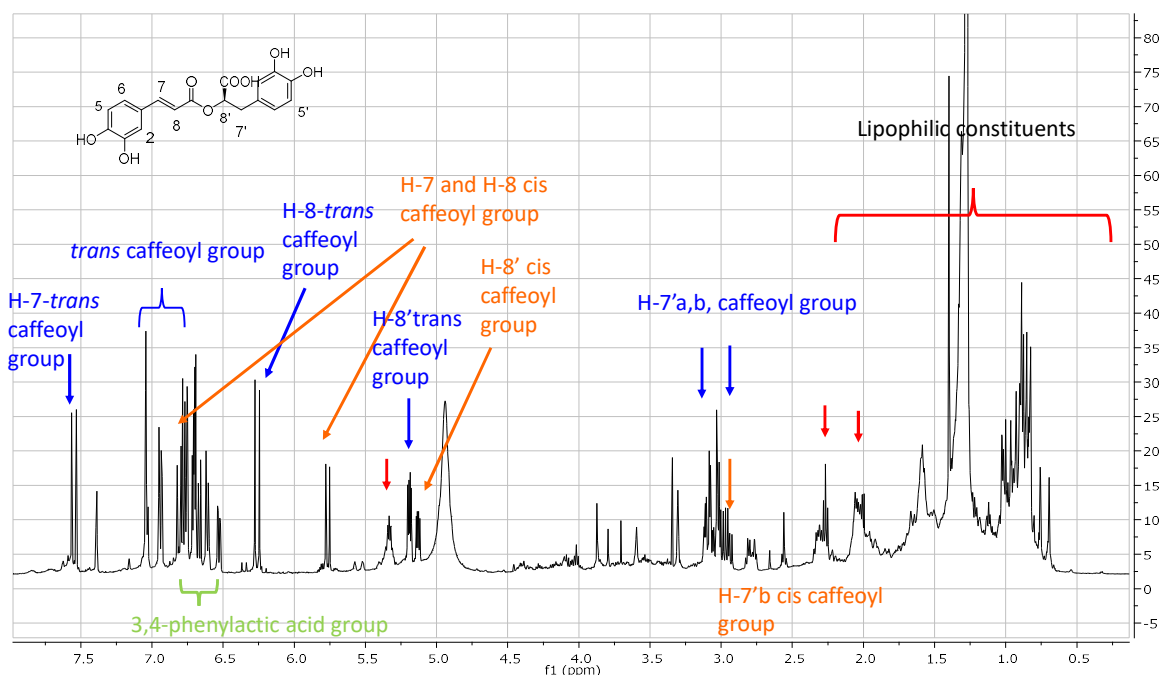

**Figure S2.** NMR spectrum of a leaves callus extract. In the <sup>1</sup>H-NMR spectrum the signals of two ABX groups are observed belonging to two phenolic rings. Protons of the caffeoyl group are shifted downfield: at  $\delta$  7.04 proton H-2 appears as doublet with  $J=1.8\text{Hz}$  due to the meta coupling with proton H-6. Proton H-5 appears as doublet at  $\delta$  6.77 with ortho- coupling ( $J=8.0\text{ Hz}$ ) to proton H-6. Proton H-6 appears at  $\delta$  6.94 as double-doublet due to coupling to protons H-2 and H-5. Similar signals are observed for the second ABX system belonging to the 3,4-dihydroxyphenyllactic acid: H-2' ( $\delta$  6.75, d,  $J = 1.8\text{Hz}$ ), H-5' ( $\delta$  6.70, d,  $J = 7.8\text{Hz}$ ) and H-6' ( $\delta$  6.61, dd,  $J = 8.2, 2.0$ ). Diagnostics are the signals of the protons H-7 and H-8 of the *trans* (E) double bond of the caffeoyl group which appear as two doublets with large coupling constants ( $J = 15.9\text{ Hz}$ ) at  $\delta$  7.54 and 6.26, respectively. At  $\delta$  5.19 a double doublet appears ( $J=3.9, 8.6$ ), which corresponds to H-8' of the methine and is due to the couplings with protons H-7'a and H-7'b. These protons are observed as double doublets at  $\delta$  3.09 (H-7'a /  $J= 3.9, 14.1$ ) and  $\delta$  2.98 (H-7'b/  $J= 8.2, 14.1$ ). In the same spectrum a second series of minor peaks appears due to the isomerization of rosmarinic acid to cis rosmarinic acid. Peaks at  $\delta$  6.81 and 5.77 ( $J = 2.8\text{ Hz}$ ) are attributed to protons H-7 and H-8 of the cis rosmarinic acid. Similarly, a double doublet at  $\delta$  5.13 is attributed to H-8' of the cis rosmarinic acid.

In red color, all signals belonging to lipophilic constituents.

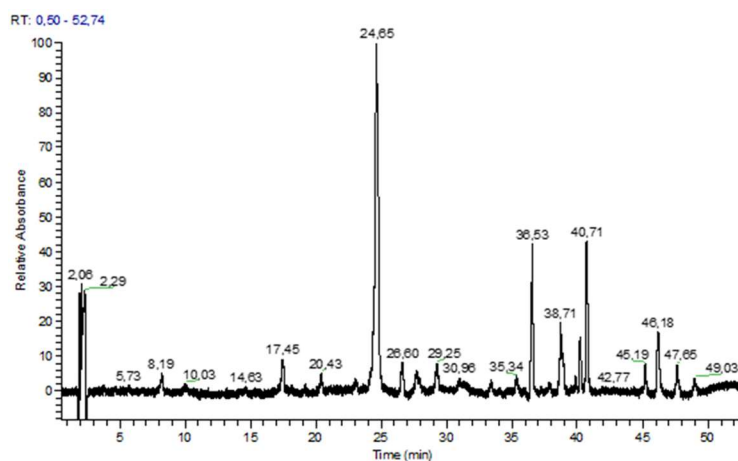

**Figure S3.** Representative chromatograms of the *Origanum dictamnus* leaves at 330 nm. Peak at 24.65 minutes belongs to rosmarinic acid. Differences in the retention time with figure S1 is due to differences in the elution program

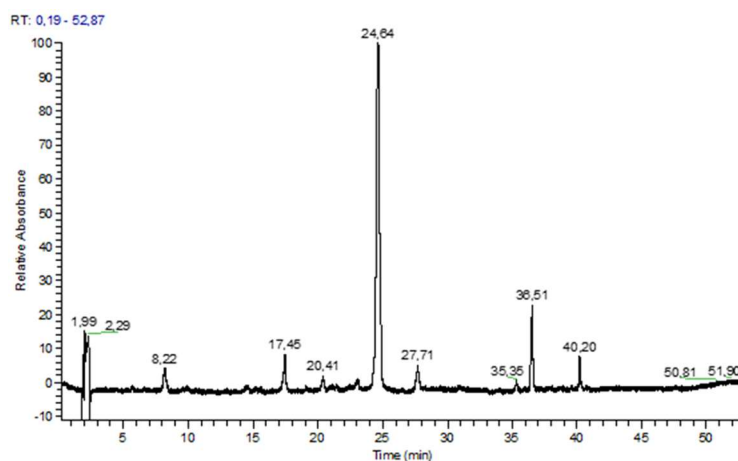

**Figure S4.** Representative chromatograms of the *Origanum dictamnus* petioles at 330 nm. Peak at 24.65 minutes belongs to rosmarinic acid. Differences in the retention time with figure S1 is due to differences in the elution program.

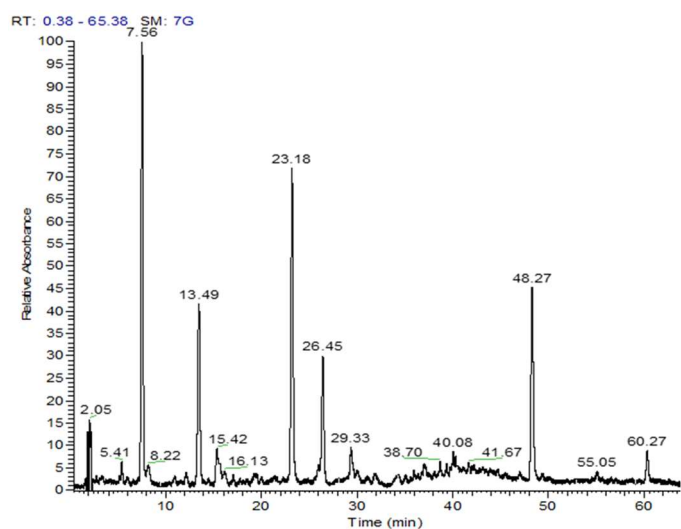

**Figure S5.** Representative chromatograms of the *Origanum dictamnus* roots at 330 nm. Peak at 23.18 minutes belongs to rosmarinic acid. Differences in the retention time with figure S1 is due to differences in the elution program.
